# Supplementary material for: Cyclic electron flow around photosystem I is essential for photosynthesis
Source: Springer Nature journal article supplement (doi:10.1038/nature02598), 2004-06-01
Supplement: 41586_2004_BFnature02598_MOESM1_ESM.pdf [file 41586_2004_BFnature02598_MOESM1_ESM.pdf]

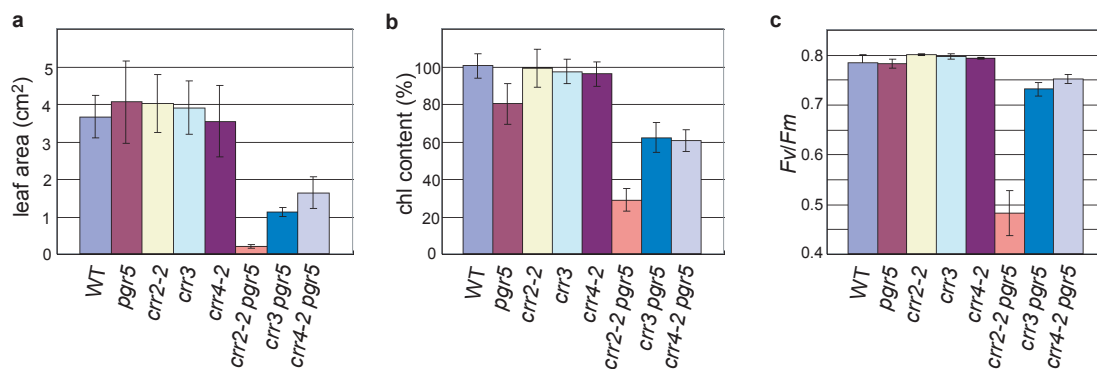

Supplementary Figure 1 Summary of the phenotypes a, Growth rate is evaluated by the leaf area. Each bar indicates a mean  $\pm$  SD ( $n=8-12$ ). b, Chl content is depicted relative to the wild type (100%). Each bar indicates a mean  $\pm$  SD ( $n=6$ ). c, The maximum activity of PSII is depicted as  $F_v/F_m$ . Each bar indicates a mean  $\pm$  SD ( $n=3$ ).
